# Supplementary material
Source: PubMed Central journal article supplement (PMC2435130)
Supplement: emboj200895s4.pdf [file emboj200895s4.pdf]

# BECK\_et\_al, Supplementary data S3

**A.**

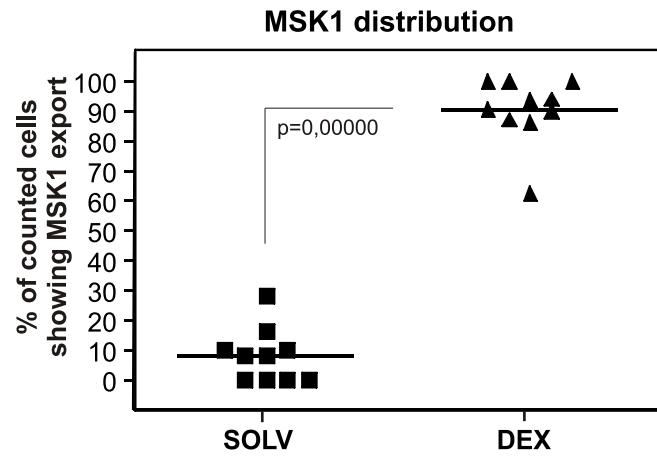

| Beta | 95% CI (Beta) |      |
|------|---------------|------|
| 4.86 | 4.08          | 5.64 |

| OR     | 95% CI (OR) |        | p-value |
|--------|-------------|--------|---------|
| 128.79 | 58.90       | 281.58 | 0,00000 |

**B.**

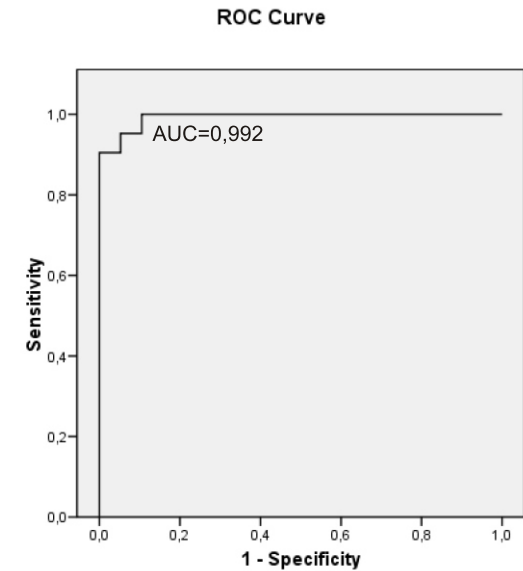

| Cell line |       |                |                | Score |        | Total  |
|-----------|-------|----------------|----------------|-------|--------|--------|
|           |       |                |                | .00   | 1.00   | .00    |
| A549      | Treat | SOLV           | Count          | 110   | 5      | 115    |
|           |       |                | % within Treat | 95.7% | 4.3%   | 100.0% |
|           | DEX   | Count          | 18             | 102   | 120    |        |
|           |       | % within Treat | 15.0%          | 85.0% | 100.0% |        |
|           | Total | Count          | 128            | 107   | 235    |        |
|           |       | % within Treat | 54.5%          | 45.5% | 100.0% |        |
| L929sA    | Treat | SOLV           | Count          | 69    | 10     | 79     |
|           |       |                | % within Treat | 87.3% | 12.7%  | 100.0% |
|           | DEX   | Count          | 4              | 78    | 82     |        |
|           |       | % within Treat | 4.9%           | 95.1% | 100.0% |        |
|           | Total | Count          | 73             | 88    | 161    |        |
|           |       | % within Treat | 45.3%          | 54.7% | 100.0% |        |
