# Supplementary material
Source: PubMed Central journal article supplement (PMC2435130)

# BECK\_et\_al, Supplementary data S1A

**A549**

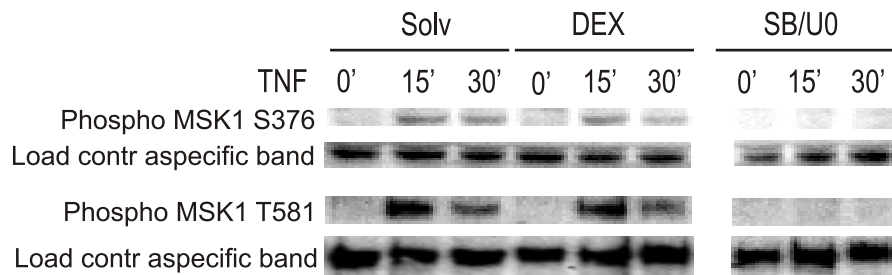

**A549, phMSK1 S376**

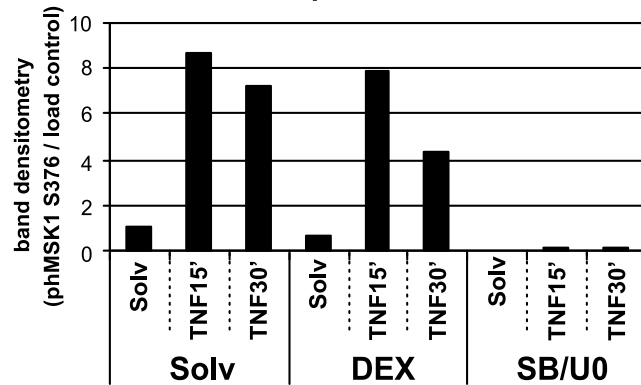

**A549, phMSK1 T581**

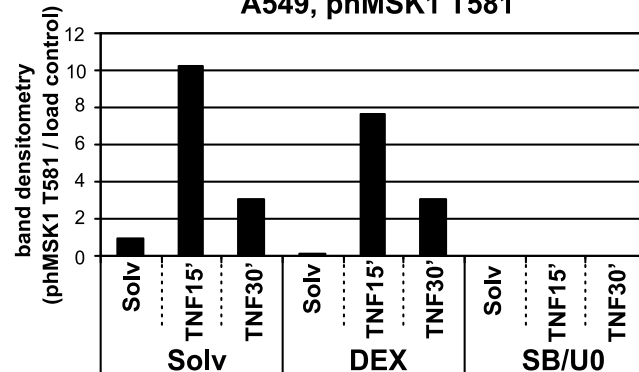

**L929sA**

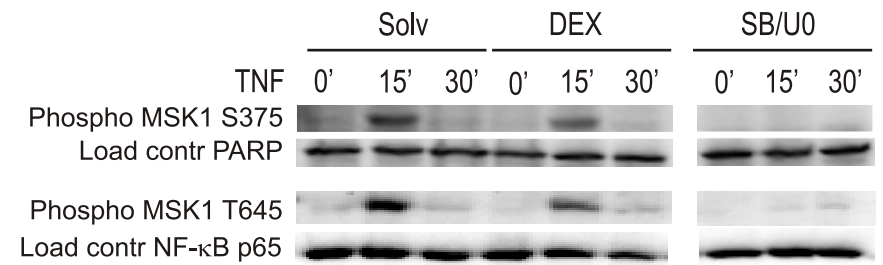

**L929sA, phMSK1 S375**

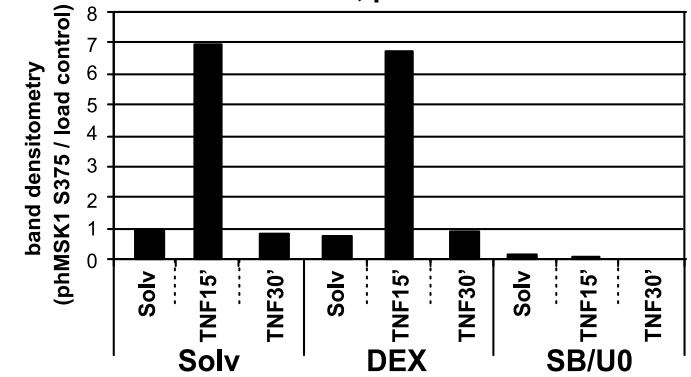

**L929sA, phMSK1 T645**

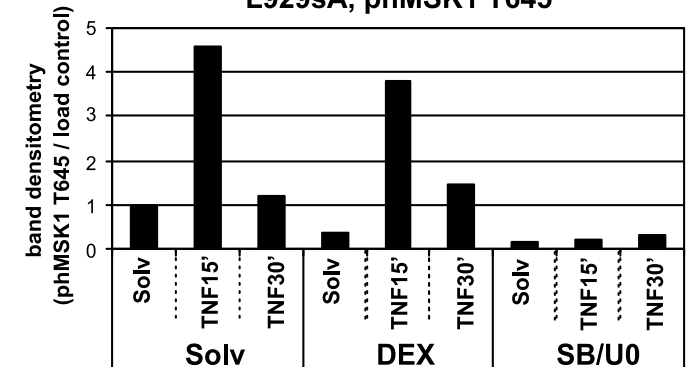

Supplement: emboj200895s1.pdf [file emboj200895s1.pdf]

# BECK\_et\_al, Supplementary data S1B

**A549**

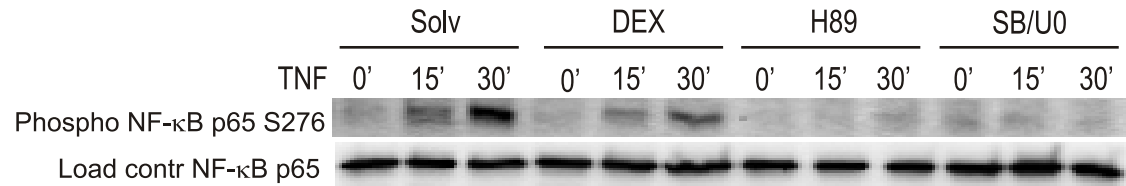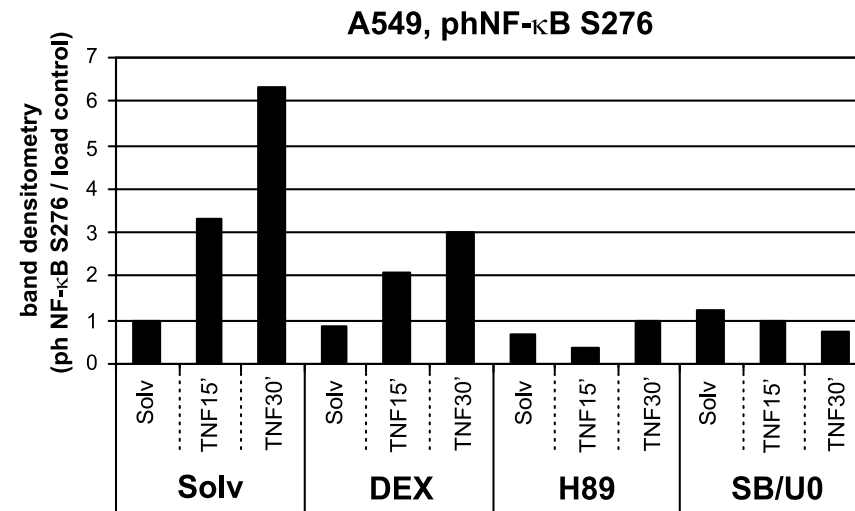

Supplement: emboj200895s2.pdf [file emboj200895s2.pdf]

# BECK\_et\_al, Supplementary data S2

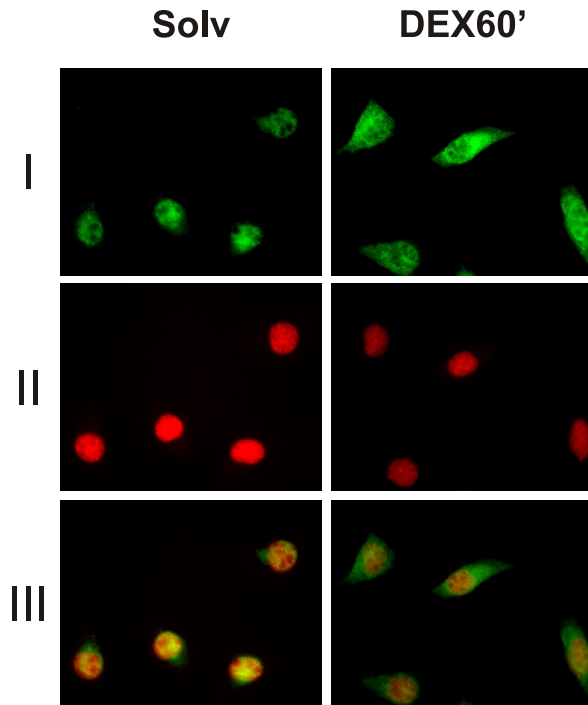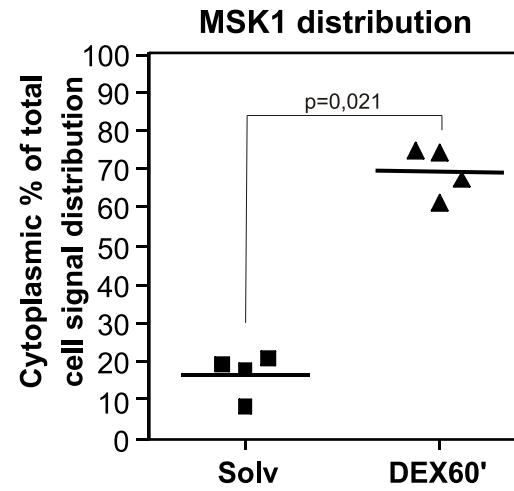

Supplement: emboj200895s3.pdf [file emboj200895s3.pdf]

# BECK\_et\_al, Supplementary data S4A

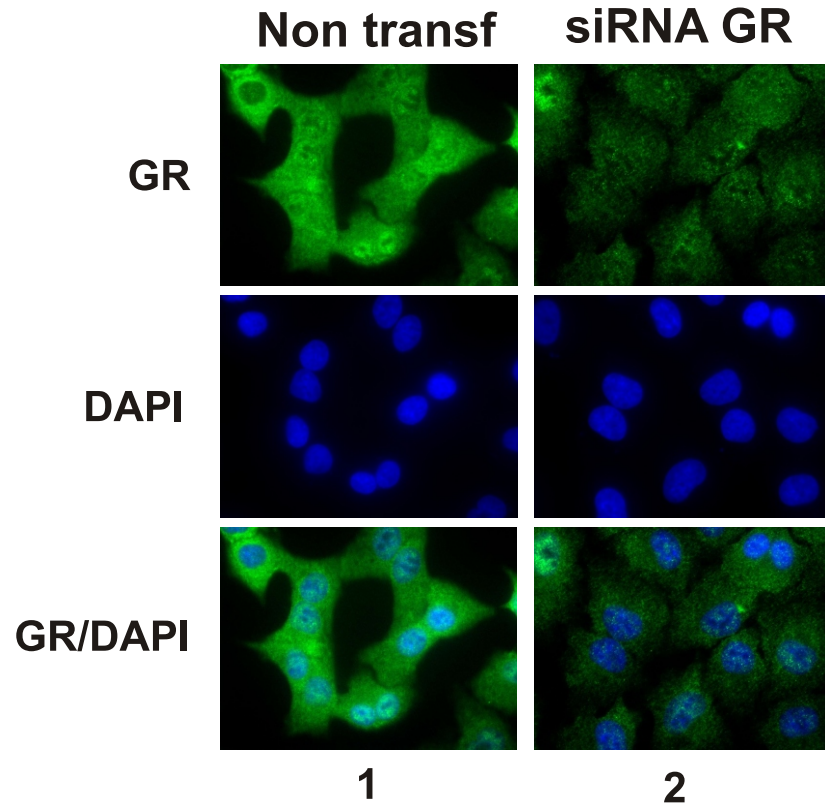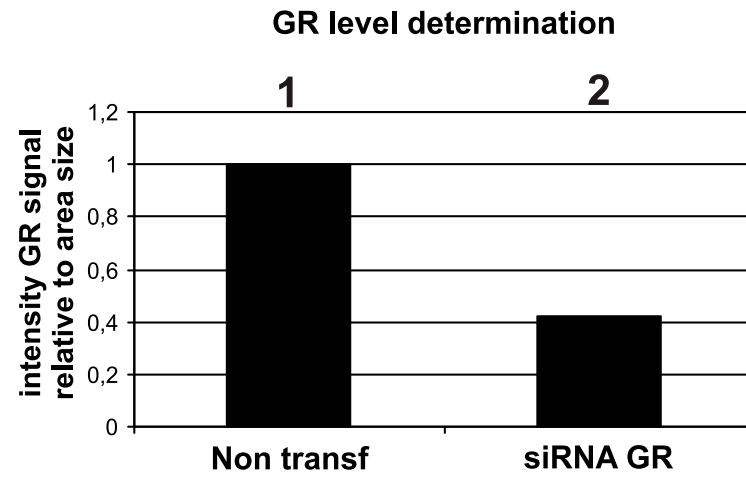

Supplement: emboj200895s5.pdf [file emboj200895s5.pdf]

# BECK\_et\_al, Supplementary data S4B

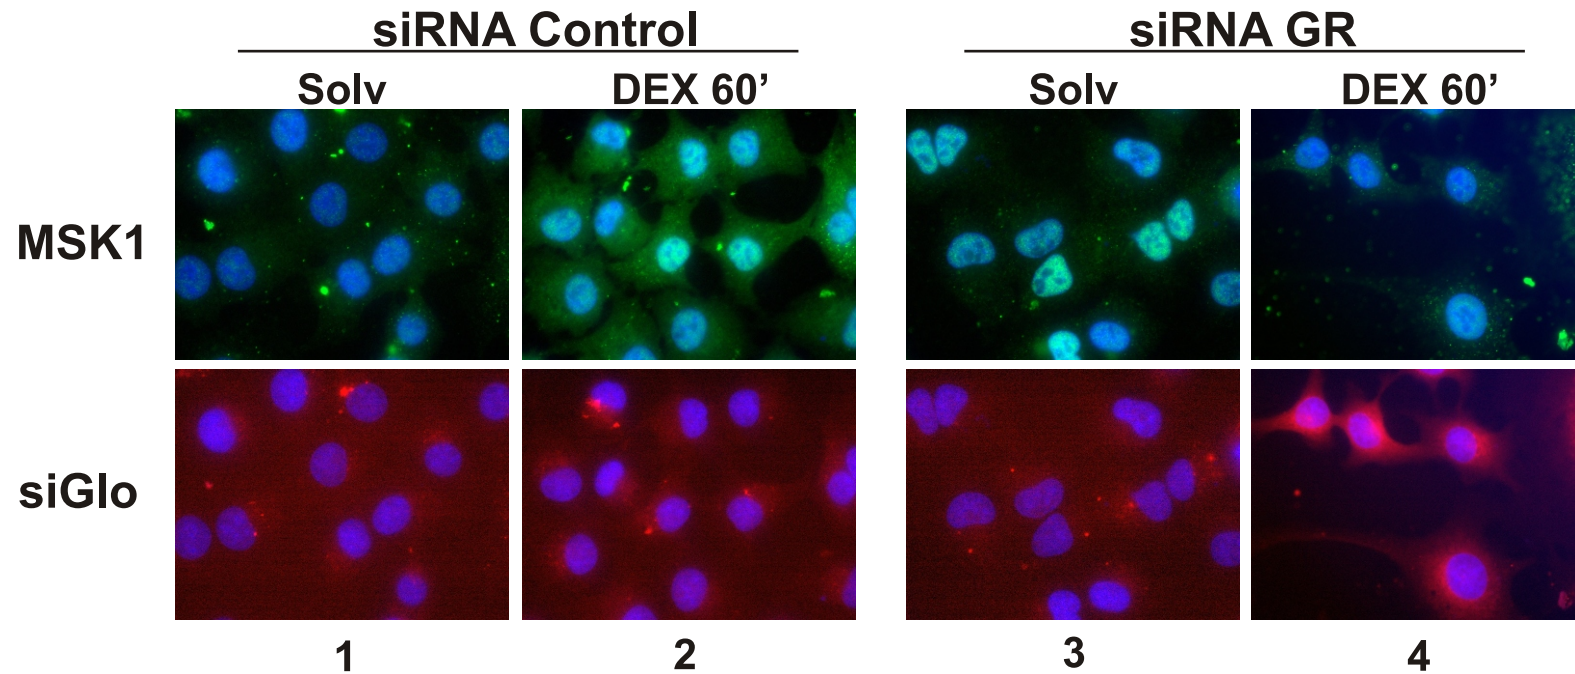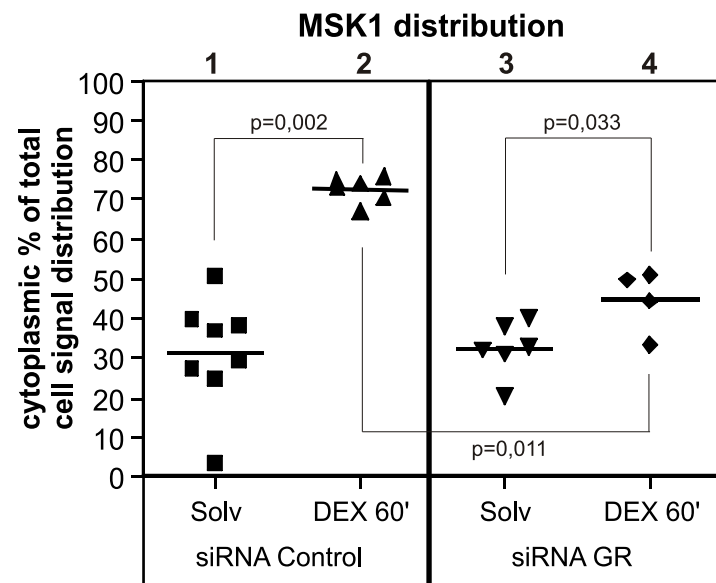

Supplement: emboj200895s6.pdf [file emboj200895s6.pdf]
